# Supplementary material for: System-level integrative analyses for production of lignin hydrogels
Source: Royal Society of Chemistry journal article supplement (doi:10.1039/d2gc03281c), 2022-01-01
Supplement: d2gc03281c1.pdf [file d2gc03281c1.pdf]

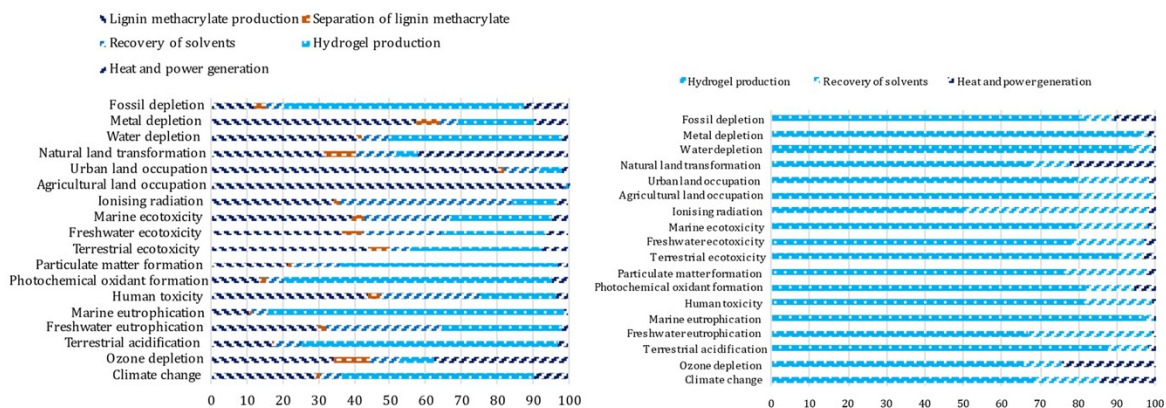

**Fig. S1** Contribution of different sub-systems (represented in %) involved in lignin hydrogel production towards 18 different categories summarizing environmental impact
